# Supplementary material for: Synthesis of star and H-shape polymersvia a combination of cobalt-mediated radical polymerization and nitrone-mediated radical coupling reactions
Source: Royal Society of Chemistry journal article supplement (doi:10.1039/c1py00297j), 2011-09-12
Supplement: c1py00297j1.pdf [file c1py00297j1.pdf]

# Supporting Information to

## Synthesis of Star and H-Shape Polymers via a Combination of Cobalt-Mediated Radical Polymerization and Nitron-Mediated Radical Coupling Reactions

*Christophe Detrembleur,<sup>†,\*</sup> Antoine Debuigne,<sup>†</sup> Ozcan Altintas,<sup>§</sup> Matthias Conradi,<sup>‡</sup> Edgar H.  
H. Wong,<sup>§,‡</sup> Christine Jérôme,<sup>†</sup> Christopher Barner-Kowollik<sup>§,\*</sup> and Tanja Junkers<sup>‡,\*</sup>*

<sup>†</sup>Center for Education and Research on Macromolecules (CERM), University of Liege,  
Belgium

<sup>§</sup>Preparative Macromolecular Chemistry, Institut für Technische Chemie und Polymerchemie,  
Karlsruhe Institute of Technology (KIT), Engesserstr. 18, 76128 Karlsruhe, Germany.

<sup>‡</sup>current address: Department of Chemical and Biomolecular Engineering, The University of  
Melbourne, Parkville, Victoria 3010, Australia.

<sup>‡</sup>Institute for Materials Research (IMO), Polymer Reaction Design Group, Universiteit  
Hasselt, Agoralaan, Gebouw D, BE-3590 Diepenbeek, Belgium.

**Table S1.** Theoretical and Measured Mass-to-Charge Ratios of the PVAc coupling product.

| X | [M + Na] <sup>+</sup>      |                            |              |
|---|----------------------------|----------------------------|--------------|
|   | <i>m/z</i> <sub>theo</sub> | <i>m/z</i> <sub>meas</sub> | $\Delta m/z$ |
| 2 | 652.39                     | 652.28                     | 0.11         |
| 3 | 738.43                     | 738.28                     | 0.15         |
| 4 | 824.47                     | 824.28                     | 0.19         |
| 5 | 910.50                     | 910.32                     | 0.18         |
| 6 | 996.54                     | 996.32                     | 0.22         |
| 7 | 1082.58                    | 1082.32                    | 0.26         |
| 8 | 1168.61                    | 1168.32                    | 0.29         |
| 9 | 1254.65                    | 1254.36                    | 0.29         |

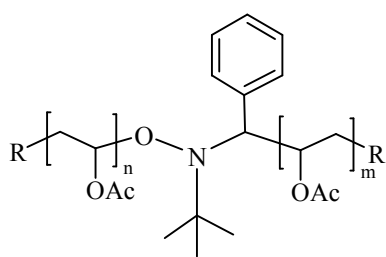

R = -C(CH<sub>3</sub>)(CN)-CH<sub>2</sub>-C(OCH<sub>3</sub>)(CH<sub>3</sub>)<sub>2</sub>

X = n + m

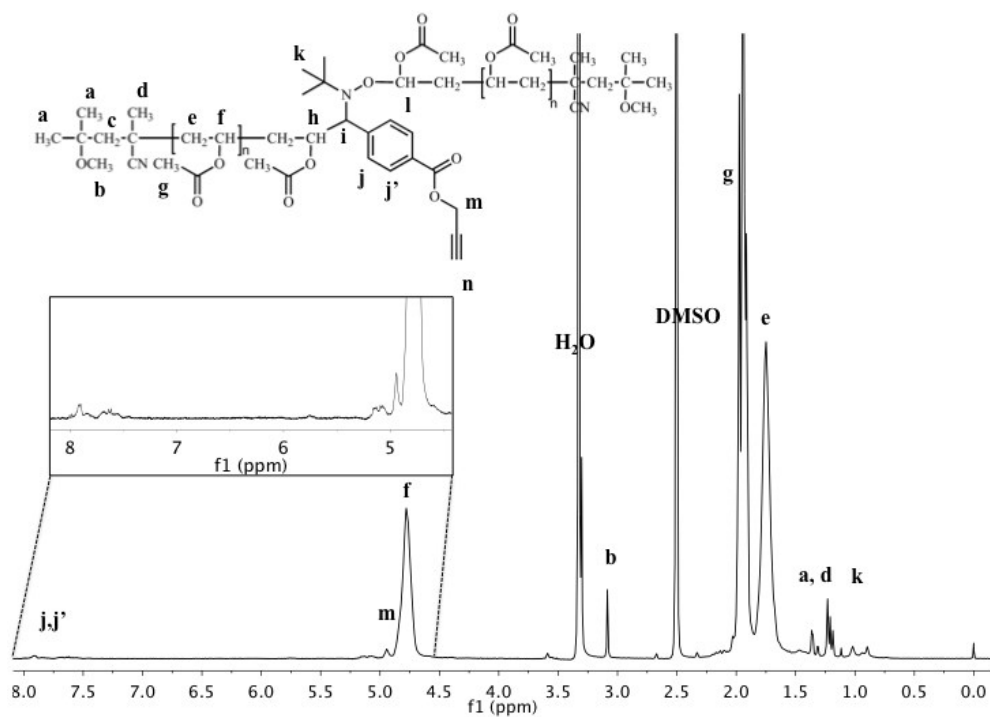

Figure S1 400 MHz <sup>1</sup>H-NMR spectrum of PVAc-Co(acac)<sub>2</sub> coupled by nitrone **3** (Table 1, entry 5).

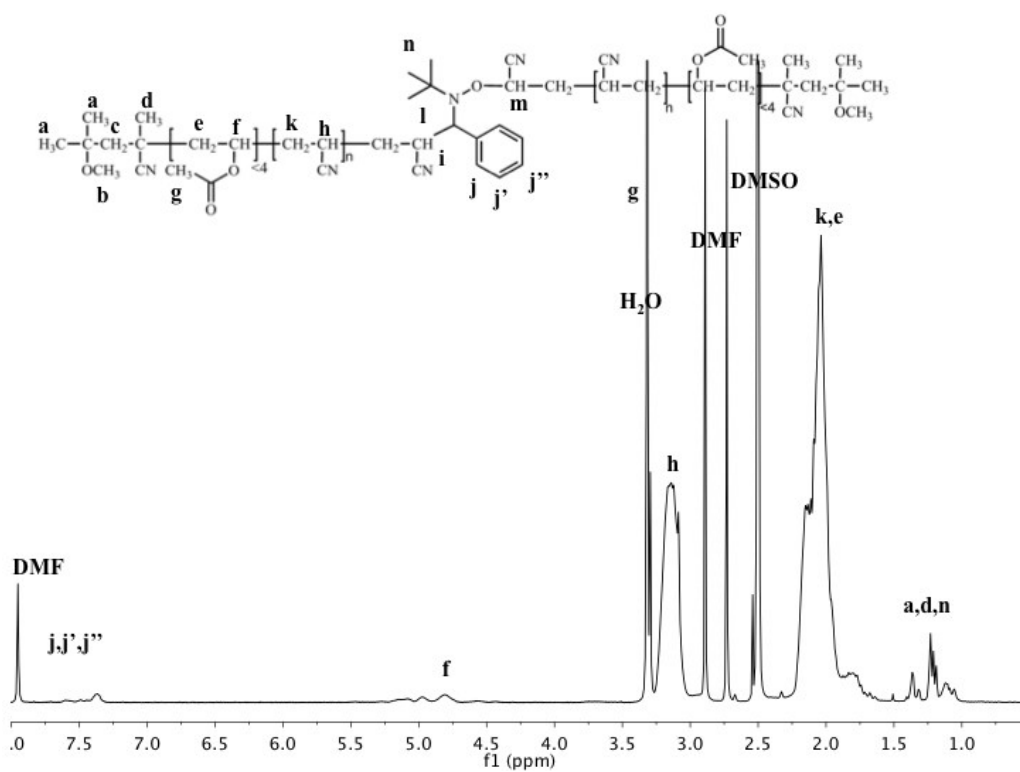

Figure S2 400 MHz <sup>1</sup>H-NMR spectrum of PAN-Co(acac)<sub>2</sub> coupled by nitrone **1** (Table 1 entry 1)

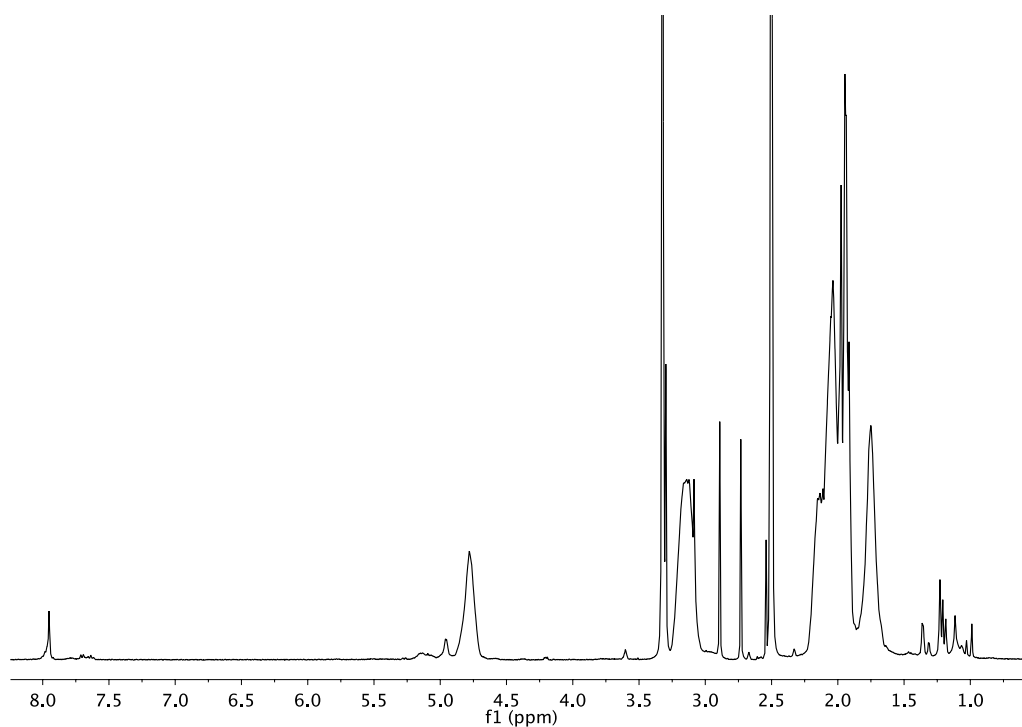

**Figure S3** 400 MHz  $^1\text{H}$ -NMR spectrum of PVAc-b-PAN-b-PVAc formed by coupling PVAc-b-PAN-Co(acac) $_2$  by nitrene **3**

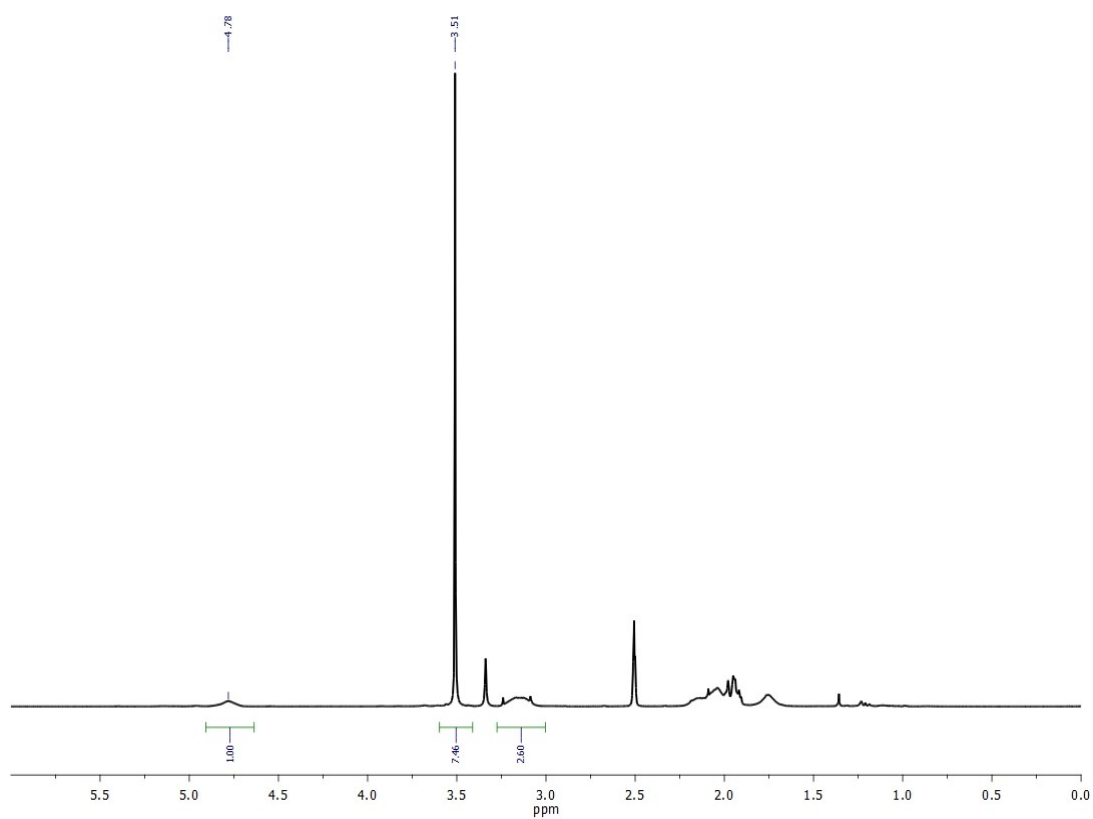

**Figure S4** 400 MHz  $^1\text{H}$ -NMR spectrum of (PVAc-PAN) $_2$ -PEG miktoarm star polymer

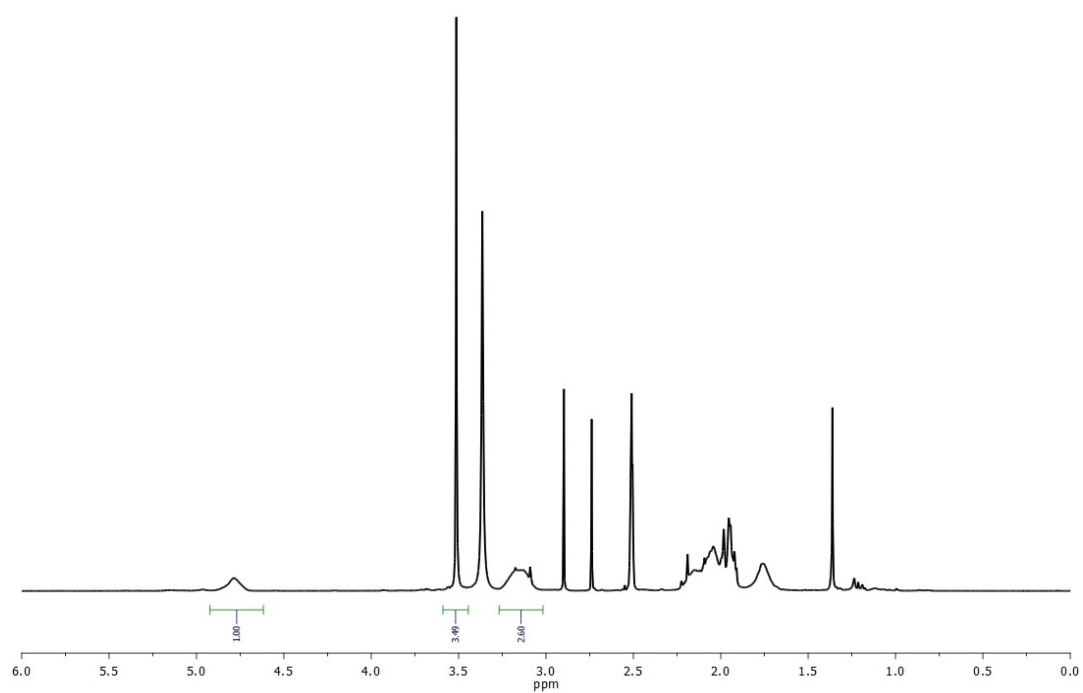

**Figure S5** 400 MHz <sup>1</sup>H-NMR spectrum of (PVAc-PAN)<sub>2</sub>-PEG-(PVAc-PAN)<sub>2</sub> H-shaped polymer
